# Supplementary material for: Ultrasensitive colorimetric assay of cadmium ion based on silver nanoparticles functionalized with 5-sulfosalicylic acid for wide practical applications
Source: Royal Society of Chemistry journal article supplement (doi:10.1039/c5an00230c), 2015-01-01
Supplement: c5an00230c1.pdf [file c5an00230c1.pdf]

## Supporting Information

### **Ultrasensitive Colorimetric Assay of Cadmium Ion Based on Silver Nanoparticles Functionalized with 5-Sulfosalicylic Acid for Wide Practical Applications**

Weiwei Jin, Pengcheng Huang, Fangying Wu,\* Li-Hua Ma\*

Department of Chemistry, Nanchang University, Nanchang 330031, China

\* Corresponding author: Fangying Wu, Tel: + 86 79183969882; Fax: + 86 79183969514; E-mail  
address: fywu@ncu.edu.cn; Li-Hua Ma, Tel: 7134802039. Email: lihua2003@gmail.com.

### **Pretreatment for real samples**

The milk samples pretreatment procedure was carried out following the general procedure.<sup>1</sup> Briefly, 2 g milk product was added into 1.5 mL of 10% trichloroacetic acid and 5.0 mL of acetonitrile mixture to remove proteins. The mixture solution was transferred to centrifugal tube to undergo sonication for 10 min and then centrifuged at 12, 000 rpm for 15 min. The supernatant was filtered through a 0.22  $\mu$ M membrane filter to remove lipids. The pH of filtrate was adjusted to 6.8, and the filtrate was filtered through 0.22  $\mu$ M membrane filter again after centrifugation. The filtered liquid was diluted with water to 10 mL for further analysis.

500  $\mu$ L of human serum was placed in a centrifuge tube and 2.0 mL of acetonitrile was added to precipitate proteins. After vortex-mixing, the sample was centrifuged at 4, 000 rpm for 15 min, and the supernatant was transferred into a 25 mL volumetric flask and diluted to the mark with deionized water. An appropriate aliquot of this solution was taken for analysis according to the general procedure.

Urine samples were diluted by 100-fold and an appropriate aliquot of this solution was taken for analysis according to the general procedure. No further pretreatment was necessary.

Water samples were deposited overnight.

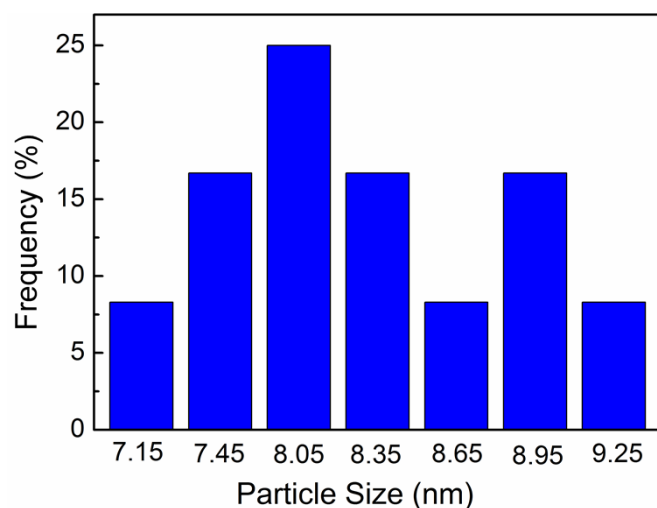

**Fig. S1** Particle size distribution histogram of SAA-AgNPs.

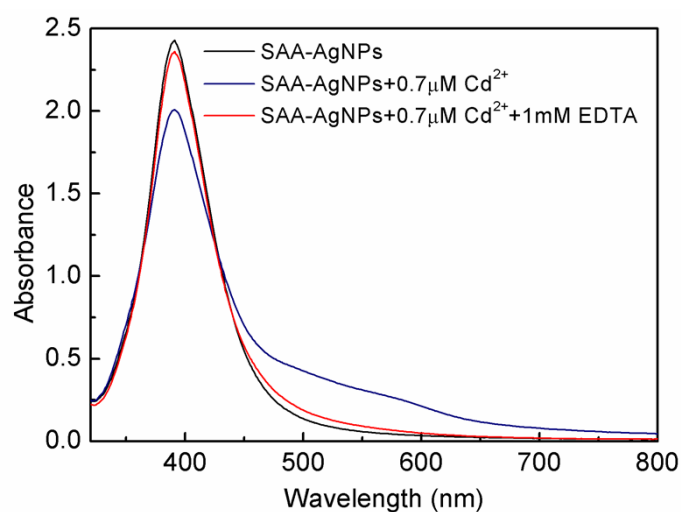

**Fig. S2** Absorption spectra of SAA-AgNPs (black line), SAA-AgNPs-Cd<sup>2+</sup> (blue line) and SAA-AgNPs-Cd<sup>2+</sup> (red line) in the presence of chelating agent EDTA.

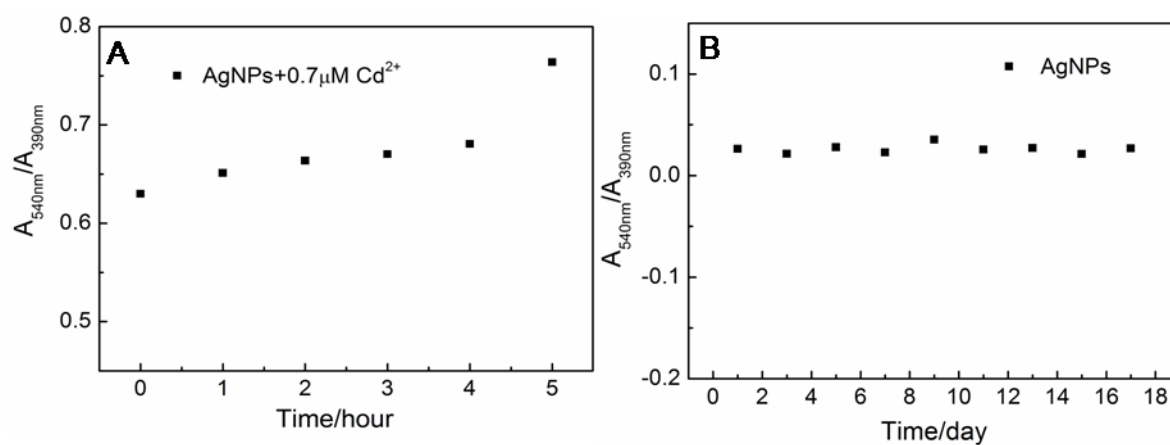

**Fig. S3** Absorbance changes of the AgNPs upon the addition of Cd<sup>2+</sup> at 25 °C for 5 h (A) and

stored at 4 °C in the dark for 18 days (B), respectively.

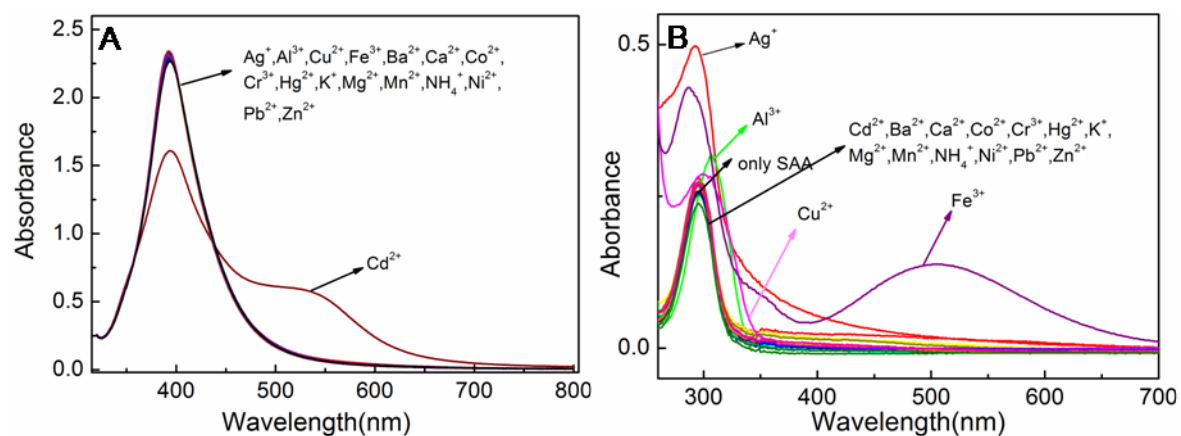

**Fig. S4** Absorption spectra of (A) SAA-AgNPs in the presence and absence of metal ions ( $0.7 \mu\text{M}$ ) and (B) SAA ( $0.1 \text{ mM}$ ) in the presence and absence of metal ions ( $70 \mu\text{M}$ ).

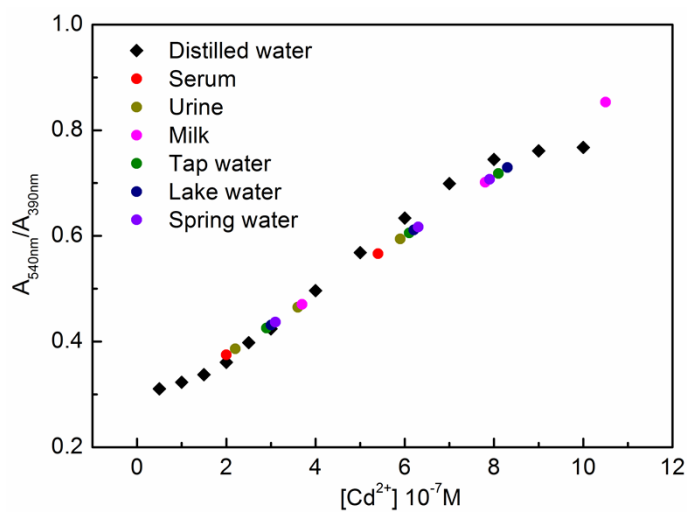

**Fig. S5** Relationship between the ratio  $A_{540\text{nm}}/A_{390\text{nm}}$  and the concentration of  $\text{Cd}^{2+}$  detection in distilled water, serum, urine, milk and water samples.

**Table S1 Cd<sup>2+</sup> Detection Methods Published.**

| Method                                                                                                            | Linearity range                      | LOD           | Response to ions                                                                                                | Recovery matrices   | Ref. |
|-------------------------------------------------------------------------------------------------------------------|--------------------------------------|---------------|-----------------------------------------------------------------------------------------------------------------|---------------------|------|
| N-(2-hydroxybenzyl)-isoleucine functionalized <b>AgNPs</b>                                                        | NA                                   | 8.9 $\mu$ M   | Cd <sup>2+</sup> , Hg <sup>2+</sup> , Pb <sup>2+</sup>                                                          | water               | 26   |
| 4-amino-3-hydrazino-5-mercapto 1,2,4-triazole modified AuNPs                                                      | 0.06-0.48 $\mu$ M                    | 0.03 $\mu$ M  | Cd <sup>2+</sup> , Pb <sup>2+</sup> , Ni <sup>2+</sup> , Co <sup>2+</sup> , Zn <sup>2+</sup> , Hg <sup>2+</sup> | water               | 23   |
| <b>AuNPs</b> based lateral flow Immunodevice                                                                      | 3.6-89 nM                            | 0.90 nM       | Cd <sup>2+</sup>                                                                                                | water               | 24   |
| Label-Free <b>AuNPs</b>                                                                                           | None                                 | 5.0 $\mu$ M   | Cd <sup>2+</sup>                                                                                                | rice                | 25   |
| Peptide-modified <b>AuNPs</b>                                                                                     | 0.50-2.0 $\mu$ M                     | 50 nM         | Cd <sup>2+</sup> , Ni <sup>2+</sup> , Co <sup>2+</sup>                                                          | water               | 27   |
| Polymer mediated aggregation of <b>AuNPs</b>                                                                      | 0-0.4 $\mu$ M                        | 4.6 nM        | Cd <sup>2+</sup> , Hg <sup>2+</sup> , Pb <sup>2+</sup> , Cu <sup>2+</sup> , Zn <sup>2+</sup>                    | none                | S1   |
| <b>Quantum dots CdTe</b> conjugated fluorescein                                                                   | 0.1-15 $\mu$ M                       | 12 nM         | Cd <sup>2+</sup>                                                                                                | water<br>HSA        | S2   |
| Turn-on fluorescent <b>InP nanoprobe</b>                                                                          | 0.2-10 $\mu$ M                       | 0.10 $\mu$ M  | Cd <sup>2+</sup>                                                                                                | water               | S3   |
| ZnS:Mn nanoparticles functionalized by PAMAM-OH dendrimer based <b>fluorescence</b> ratiometric probe             | 23.4-1100 $\mu$ M                    | 23.44 $\mu$ M | Cd <sup>2+</sup>                                                                                                | water               | S4   |
| <b>Colorimetric and fluorogenic</b> detection of Cd <sup>2+</sup>                                                 | 0-4 $\mu$ M                          | 0.70 $\mu$ M  | Cd <sup>2+</sup> , Zn <sup>2+</sup> , Cu <sup>2+</sup>                                                          | none                | S5   |
| Two-Photon <b>fluorescent Probe</b>                                                                               | NA                                   | 23.63 nM      | Cd <sup>2+</sup> , Zn <sup>2+</sup>                                                                             | live cells<br>image | 34   |
| Ratiometric indicator based surface-enhanced <b>raman spectroscopy</b>                                            | 0.01-0.21 $\mu$ M                    | 2.9 nM        | Cd <sup>2+</sup>                                                                                                | water               | S6   |
| Ratiometric <b>electrochemical</b> sensor                                                                         | 0.1-10 $\mu$ M                       | 10 nM         | Cd <sup>2+</sup>                                                                                                | water               | S7   |
| <b>Voltammetric</b> detection of cadmium ions                                                                     | NA                                   | 5.0 nM        | Cd <sup>2+</sup> , Pb <sup>2+</sup> , Cu <sup>2+</sup>                                                          | none                | S8   |
| <b>Electrochemical</b> sensor for the sensitive detection of Cd <sup>2+</sup> nanographeneand Nafion              | 2.22-44.5 nM                         | 0.03 nM       | Cd <sup>2+</sup>                                                                                                | water               | S9   |
| Photoelectrochemical detection of Cd <sup>2+</sup> based on <b>electrodeposited</b> on TiO <sub>2</sub> nanotubes | 10 <sup>-9</sup> -10 <sup>-2</sup> M | 0.35 nM       | Cd <sup>2+</sup>                                                                                                | water               | S10  |
| SnO <sub>2</sub> /reduced graphene oxide nanocomposite for the simultaneous <b>electrochemical</b> detection      | 0-1.3 $\mu$ M                        | 0.101 nM      | Cd <sup>2+</sup> , Cu <sup>2+</sup> , Hg <sup>2+</sup> , Pb <sup>2+</sup>                                       | none                | S11  |

|                                                                                                          |                    |          |                                                        |                  |           |
|----------------------------------------------------------------------------------------------------------|--------------------|----------|--------------------------------------------------------|------------------|-----------|
| Maize tassel–MWCNTs composite for Cd <sup>2+</sup> detection using <b>cyclic voltammetry</b>             | 0.018-0.27 $\mu$ M | 4.5 nM   | Cd <sup>2+</sup>                                       | water            | S12       |
| Determination of lead, cadmium and copper by <b>flame atomic absorption spectrometry</b>                 | 0-0.36 $\mu$ M     | 27 nM    | Cd <sup>2+</sup> , Pb <sup>2+</sup> , Cu <sup>2+</sup> | plant leaves     | S13       |
| Determination of Cd <sup>2+</sup> in urine by tungsten-coil <b>ICP-AES</b>                               | 0.0018-1.8 $\mu$ M | 1.8 nM   | Cd <sup>2+</sup>                                       | urine            | S14       |
| Direct fluorescence detection of Pb <sup>2+</sup> and Cd <sup>2+</sup> by <b>HPLC</b>                    | 5-200 nM           | 3.3 nM   | Cd <sup>2+</sup> , Pb <sup>2+</sup>                    | water            | S15       |
| New <b>magnetic polymeric nanoparticles</b>                                                              | 7.1-534 nM         | 0.80 nM  | Cd <sup>2+</sup>                                       | diesel oil       | S16       |
| <b>Magnetic nanoparticles</b> as asorbent for the preconcentration and determination of Cd <sup>2+</sup> | 0.089-4.4 nM       | 0.033 nM | Cd <sup>2+</sup>                                       | food water       | S17       |
| SAA modified AgNPs                                                                                       | 0.05-1.0 $\mu$ M   | 3.0 nM   | Cd <sup>2+</sup>                                       | water serum milk | This work |

## References

- S1 Y. G. Wu, S. S. Zhan, L. M. Wang and Z. Pei, *Analyst*, 2014, **139**, 1550.
- S2 R. J. Gui, X. Q. An and W. X. Huang, *Anal. Chim. Acta*, 2013, **767**, 134.
- S3 Y. Zhang, Z. L. Zhang, D. H. Yin, J. Li, R. G. Xie and W. S. Yang, *ACS Appl. Mater. Interfaces*, 2013, **5**, 9709.
- S4 B. B. Campos, M. Algarra, K. Radotic, D. Mutavdzic, E. R. Castllon, J. J. Jimenea, B. Alonso, C. M. Casado and J. C. G. Esteves da Silva, *Talanta*, 2015, **134**, 317.
- S5 S. Goswami, K. Aich, S. Das, A. K. Das, A. Manna and S. Halder, *Analyst*, 2013, **138**, 1903.
- S6 Y. Chen, Z. P. Chen, S. Y. Long and R. Q. Yu, *Anal. Chem.*, 2014, **86**, 12236.
- S7 X. L. Chai, L. Zhang and Y. Tian, *Anal. Chem.*, 2014, **86**, 10668.
- S8 E. Chow, D. B. Hibbert and J. J. Gooding, *Analyst*, 2005, **130**, 831.
- S9 L. D. Wu, X. C. Fu, H. Liu, J. C. Li and Y. Song, *Anal. Chim. Acta.*, 2014, **851**, 43.
- S10 Y. Liang, B. Kong, A. W. Zhu, Z. Wang and Y. Tian, *Chem. Commun.*, 2012, **48**, 245.
- S11 Y. Wei, C. Gao, F. L. Meng, H. H. Li, L. Wang, J. H. Liu and X. J. Huang, *J. Phy. Chem. C.*, 2012, **116**, 1034.
- S12 M. Moyo and J. O. Okonkwo, *Sensor Actuat. B.-Chem.*, 2014, **193**, 515.
- S13 G. Kaya and M. Yaman, *Talanta*, 2008, **75**, 1127.

- S14 A. C. Davis, C. P. Calloway Jr and B. T. Jones, *Talanta*, 2007, **71**, 1144.
- S15 S. Saito, N. Danzaka and S. Hoshi, *J. Chromatogr. A.*, 2006, **1104**, 140.
- S16 H. Ebrahimzadeh, M. Kasaieian, A. Khalilzadeh and E. Moazzen, *Anal. Method*, 2014, **6**, 4617.
- S17 A. Mirabi, Z. Dalirandeh and A. S. Rad, *J. Magn. Mater.*, 2015, **381**, 138.
